# Supplementary material
Source: MDPI journal article supplement (https://www.mdpi.com/2039-4713/14/2/36)
Supplement: s1 [file s1]

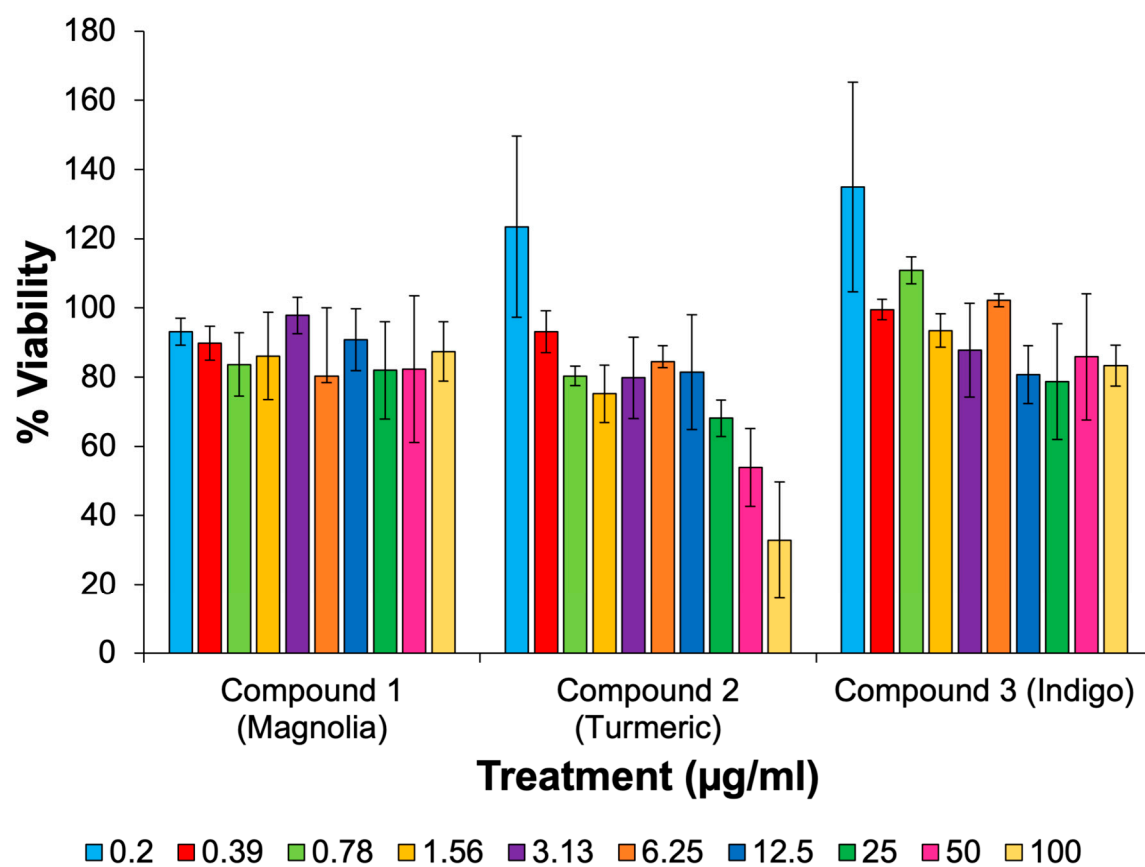

**Figure S1.** MTT assay results for the three compounds tested, Magnolia Bark, Turmeric and Indigo to determine the concentration at which at least 75% cell viability was observed. Various concentrations of the compounds were added in duplicate to the wells. The assay was repeated twice. The results are expressed as percentage cell viability.
